# Supplementary material for: Modulation of Saliva Microbiota through Prebiotic Intervention in HIV-Infected Individuals
Source: MDPI journal article supplement (doi:10.3390/nu11061346), 2019-06-14

Figure S2: Linear discriminative analysis (LDA) effect size (LEfSe) at OTU level between (a) four groups: control, IR, INR, VU. (b) HIV- and HIV-infected groups at baseline. LDA scores for the significant taxa in HIV-infected group are represented on the positive scale (green) and LDA-negative scores represented enriched taxa in control group (red).

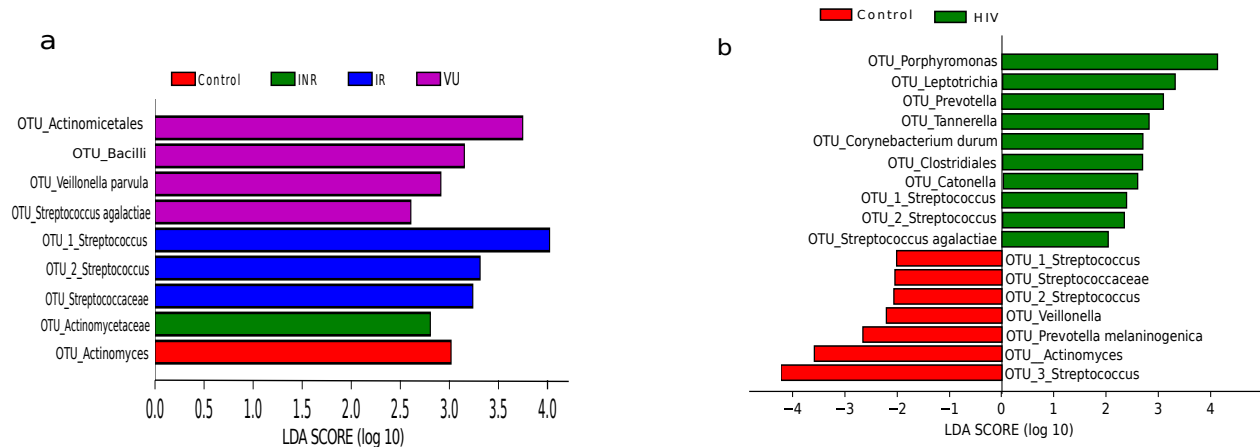

Supplement: s1 [file s1]
