# Supplementary material for: Modulation of Saliva Microbiota through Prebiotic Intervention in HIV-Infected Individuals
Source: MDPI journal article supplement (doi:10.3390/nu11061346), 2019-06-14

Figure S5. Heatmap based on the percentage of taxa that co-occurred. (a) At baseline (b) After prebiotics . We only considered the taxa that presented a percentage, in all the groups, higher than 5%. INR, immunological ART non-responders; IR, immunological ART responders; VU, viremic untreated

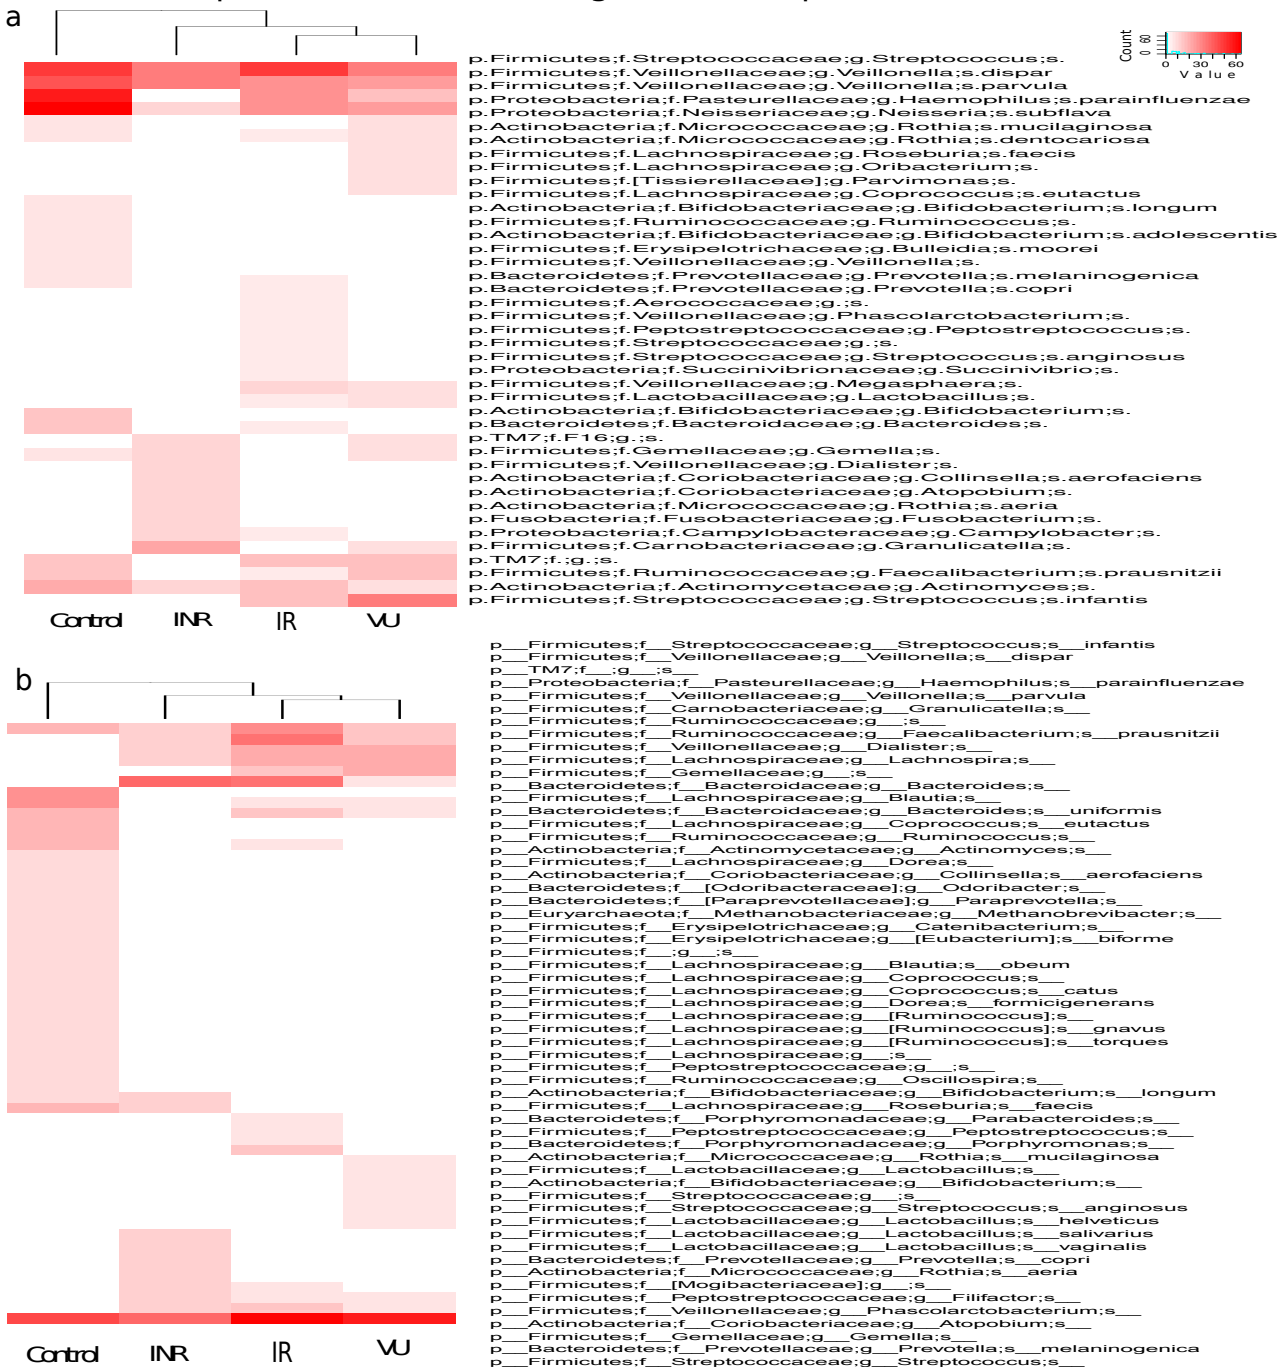

Supplement: s1 [file s1]
