# Supplementary material for: Modulation of Saliva Microbiota through Prebiotic Intervention in HIV-Infected Individuals
Source: Nutrients. 2019 Jun 14;11(6):1346. doi: 10.3390/nu11061346 (PMC6627446; doi:10.3390/nu11061346)
Supplement: Supplementary file 1 [file nutrients-11-01346-s001.zip]

Archive with 10 entries (10 files):
- FigureS1.pdf
- FigureS2.pdf
- FigureS3.pdf
- FigureS4.pdf
- FigureS5.pdf
- Table S1.doc
- Table S2.xls
- Table S3.xls
- Table S4.xls
- Table S5.xls
