# Supplementary material for: Modulation of Saliva Microbiota through Prebiotic Intervention in HIV-Infected Individuals
Source: Nutrients. 2019 Jun 14;11(6):1346. doi: 10.3390/nu11061346 (PMC6627446; doi:10.3390/nu11061346)
Supplement: Supplementary file 1 [file nutrients-11-01346-s001.zip › Table S3.xls]

## Sheet: power.t.test.n2_F1
Table S3. Sample size determination (n2) for groups before prebiotic intervention
feature	g1	g2	n1	real.n2	estimated.n2	sig.level	Cohen.effect.size	fixed.effect.size	pct.power	t.test.p.value
CD4_DR38	Control	IR	12	13	7.48645707466175	0.05	3.14329181690233	1.6	90	5.3211134793586e-07
CD4_DR38	Control	INR	12	9	7.48645707466175	0.05	4.92857968456687	1.6	90	1.66981399147435e-06
cd4	Control	INR	12	9	7.48645707466175	0.05	2.74847886096723	1.6	90	1.13861381946523e-05
CD8_DR38	Control	VU	12	10	7.48645707466175	0.05	3.14512022043069	1.6	90	4.33369639384965e-05
cd4	INR	IR	9	13	9.58334606570678	0.05	1.94901167656443	1.6	90	0.00018315189320528
cd4cd8ratio	Control	VU	12	10	7.48645707466175	0.05	1.85074230014537	1.6	90	0.000343151487421059
CD8_DR38	Control	INR	12	9	7.48645707466175	0.05	2.21784583173129	1.6	90	0.000406844685750473
CD8_DR38	INR	VU	9	10	9.58334606570678	0.05	2.19765014254656	1.6	90	0.00044485455535838
CD4_DR38	INR	IR	9	13	9.58334606570678	0.05	1.9181174968557	1.6	90	0.000603209585364418
CD8_DR38	IR	VU	13	10	7.09801008399674	0.05	1.73806886931942	1.6	90	0.000795187318464069
CD4_DR38	Control	VU	12	10	7.48645707466175	0.05	2.07055111015684	1.6	90	0.00120605767399616
CD4_25	Control	INR	12	9	7.48645707466175	0.05	1.76541937737477	1.6	90	0.00125972344696186
cd4	INR	VU	9	10	9.58334606570678	0.05	1.82188061880635	1.6	90	0.00193467129142029
logtrecs	Control	INR	12	9	7.48645707466175	0.05	1.48405855217847	1.6	90	0.00293349651057315
cd4cd8ratio	Control	INR	12	9	7.48645707466175	0.05	1.48470338071092	1.6	90	0.0031683133610372
logfxtimica	Control	VU	12	10	7.48645707466175	0.05	1.4299508663421	1.6	90	0.0033291971363495
cd8	Control	VU	12	10	7.48645707466175	0.05	1.50596454908045	1.6	90	0.00346701919406334
cd4cd8ratio	Control	IR	12	13	7.48645707466175	0.05	1.25633414269236	1.6	90	0.00751217236941067
CD4_25	Control	VU	12	10	7.48645707466175	0.05	1.38857895238218	1.6	90	0.00886826120102449
CD4_DR38	IR	VU	13	10	7.09801008399674	0.05	1.46477588320809	1.6	90	0.00887684276642374
CD8_DR38	Control	IR	12	13	7.48645707466175	0.05	1.1924316128665	1.6	90	0.00922173730234652
cd8	INR	VU	9	10	9.58334606570678	0.05	1.31527973211209	1.6	90	0.0105040274405649
cd8	IR	VU	13	10	7.09801008399674	0.05	1.31087564627559	1.6	90	0.0109987291723336
CD4_25	Control	IR	12	13	7.48645707466175	0.05	1.09826051128002	1.6	90	0.0115714667009194
CD4_57	Control	VU	12	10	7.48645707466175	0.05	1.31535213058913	1.6	90	0.0123466036414566
logtrecs	INR	VU	9	10	9.58334606570678	0.05	1.25529077287341	1.6	90	0.0159040971972353
cd4cd8ratio	IR	VU	13	10	7.09801008399674	0.05	1.06244080494795	1.6	90	0.0234426472421332
logfxtimica	Control	IR	12	13	7.48645707466175	0.05	0.974358945195577	1.6	90	0.0241128546326264
adma	Control	IR	12	13	7.48645707466175	0.05	0.948325160220274	1.6	90	0.0261996600215436
CD4_57	IR	VU	13	10	7.09801008399674	0.05	1.10743441367304	1.6	90	0.0299220450881837
glu	Control	VU	12	10	7.48645707466175	0.05	0.98365810230803	1.6	90	0.0302505866997393
glu	IR	VU	13	10	7.09801008399674	0.05	0.940395372599077	1.6	90	0.0318920299601532
col	Control	VU	12	10	7.48645707466175	0.05	0.951645277397516	1.6	90	0.0356552730426845
logfxtimica	Control	INR	12	9	7.48645707466175	0.05	0.977342306027514	1.6	90	0.0361527598602816
col	Control	INR	12	9	7.48645707466175	0.05	0.920100382960586	1.6	90	0.0464468235090168
ldl	Control	VU	12	10	7.48645707466175	0.05	0.892317153108807	1.6	90	0.047242324399745
hdl	Control	VU	12	10	7.48645707466175	0.05	0.876931047883701	1.6	90	0.0505769218719064
CD8_25	Control	INR	12	9	7.48645707466175	0.05	1.0382633526124	1.6	90	0.0515259027053785
creat	Control	VU	12	10	7.48645707466175	0.05	0.862603595462213	1.6	90	0.0557886998062789
glu	INR	VU	9	10	9.58334606570678	0.05	0.992438297893684	1.6	90	0.0574894020685461
CD4_DR38	INR	VU	9	10	9.58334606570678	0.05	0.934384534110763	1.6	90	0.0639546561503346
SCD14	Control	INR	12	9	7.48645707466175	0.05	0.898128269927545	1.6	90	0.0651464587510419
logtrecs	INR	IR	9	13	9.58334606570678	0.05	0.828361573590688	1.6	90	0.0665843025457305
dim	Control	VU	12	10	7.48645707466175	0.05	0.831153761481929	1.6	90	0.0670847684237392
creat	Control	INR	12	9	7.48645707466175	0.05	0.804548365866766	1.6	90	0.0772792726666544
CD4_57	Control	INR	12	9	7.48645707466175	0.05	0.861760898662616	1.6	90	0.0802837557894003
creat	Control	IR	12	13	7.48645707466175	0.05	0.723167796550036	1.6	90	0.0876146240464741
ldl	IR	VU	13	10	7.09801008399674	0.05	0.749251758750632	1.6	90	0.0893539113742688
ldl	Control	INR	12	9	7.48645707466175	0.05	0.76328672196364	1.6	90	0.0984296379558824
CD4_25	IR	VU	13	10	7.09801008399674	0.05	0.789083091774403	1.6	90	0.0989420978865768
CD4_25	INR	IR	9	13	9.58334606570678	0.05	0.767785090860531	1.6	90	0.101736275028431
cd4	Control	IR	12	13	7.48645707466175	0.05	0.658462624152042	1.6	90	0.11407778326994
CD8_57	INR	VU	9	10	9.58334606570678	0.05	0.766814894257932	1.6	90	0.114833896153827
hdl	Control	IR	12	13	7.48645707466175	0.05	0.658822912427878	1.6	90	0.122604970119138
CD8_57	IR	VU	13	10	7.09801008399674	0.05	0.680077987820922	1.6	90	0.123097557230549
hdl	Control	INR	12	9	7.48645707466175	0.05	0.671099092248904	1.6	90	0.133956196540925
adma	Control	VU	12	10	7.48645707466175	0.05	0.693044313236736	1.6	90	0.139858411447613
logtrecs	Control	IR	12	13	7.48645707466175	0.05	0.606589595860409	1.6	90	0.143539555973681
col	IR	VU	13	10	7.09801008399674	0.05	0.63272858988506	1.6	90	0.149027684899202
CD8_25	Control	IR	12	13	7.48645707466175	0.05	0.593424982436106	1.6	90	0.150319469675787
pcr	IR	VU	13	10	7.09801008399674	0.05	0.609438232429937	1.6	90	0.151024150900434
CD8_25	INR	IR	9	13	9.58334606570678	0.05	0.714003290694094	1.6	90	0.151916148609089
CD4_57	INR	VU	9	10	9.58334606570678	0.05	0.676703181018499	1.6	90	0.156635537931984
CD8_57	Control	VU	12	10	7.48645707466175	0.05	0.603530846048527	1.6	90	0.172124264327076
cd4	Control	VU	12	10	7.48645707466175	0.05	0.605799248118618	1.6	90	0.174394560627954
SCD14	Control	IR	12	13	7.48645707466175	0.05	0.553108433115988	1.6	90	0.178375341958873
col	INR	IR	9	13	9.58334606570678	0.05	0.597750934400135	1.6	90	0.188565069299754
ldl	INR	IR	9	13	9.58334606570678	0.05	0.598856164001422	1.6	90	0.197081275337874
cd4cd8ratio	INR	IR	9	13	9.58334606570678	0.05	0.627248693881989	1.6	90	0.198621019737636
logfxtimica	IR	VU	13	10	7.09801008399674	0.05	0.563170501308057	1.6	90	0.201513878542256
logfxtimica	INR	VU	9	10	9.58334606570678	0.05	0.603780703947753	1.6	90	0.204010481925754
dim	IR	VU	13	10	7.09801008399674	0.05	0.550001572367266	1.6	90	0.207742081820835
logtrecs	Control	VU	12	10	7.48645707466175	0.05	0.522223263032859	1.6	90	0.228768800945163
SCD14	INR	VU	9	10	9.58334606570678	0.05	0.570721752904792	1.6	90	0.232323836639506
bpi	IR	VU	13	10	7.09801008399674	0.05	0.488920392850965	1.6	90	0.240903787283059
CD4_57	INR	IR	9	13	9.58334606570678	0.05	0.544894476915454	1.6	90	0.254079940719211
CD4_57	Control	IR	12	13	7.48645707466175	0.05	0.47006953475336	1.6	90	0.254194577730498
bpi	Control	IR	12	13	7.48645707466175	0.05	0.444782066842659	1.6	90	0.275429335642099
il6	Control	IR	12	13	7.48645707466175	0.05	0.465951511748994	1.6	90	0.275797177292338
CD8_25	Control	VU	12	10	7.48645707466175	0.05	0.510270957745877	1.6	90	0.283256356950367
col	Control	IR	12	13	7.48645707466175	0.05	0.4376711577601	1.6	90	0.290662843255733
cd8	Control	IR	12	13	7.48645707466175	0.05	0.434501118004633	1.6	90	0.293738292675857
CD8_25	IR	VU	13	10	7.09801008399674	0.05	0.484035203994891	1.6	90	0.307135974304157
bpi	INR	IR	9	13	9.58334606570678	0.05	0.428823862759746	1.6	90	0.315917750843002
il6	INR	IR	9	13	9.58334606570678	0.05	0.490043919852989	1.6	90	0.316015451151691
CD8_25	INR	VU	9	10	9.58334606570678	0.05	0.41962328212833	1.6	90	0.37240400925225
dim	Control	INR	12	9	7.48645707466175	0.05	0.436570725288796	1.6	90	0.374585196913861
pcr	Control	VU	12	10	7.48645707466175	0.05	0.371815721746834	1.6	90	0.385539735430281
pcr	INR	IR	9	13	9.58334606570678	0.05	0.373527651411006	1.6	90	0.390534291427833
hdl	IR	VU	13	10	7.09801008399674	0.05	0.356091434135577	1.6	90	0.414443953245094
il6	Control	VU	12	10	7.48645707466175	0.05	0.343540549920189	1.6	90	0.420392323506823
dim	Control	IR	12	13	7.48645707466175	0.05	0.296965920482795	1.6	90	0.466133610657147
CD4_25	INR	VU	9	10	9.58334606570678	0.05	0.313873078870945	1.6	90	0.499339239506393
dim	INR	IR	9	13	9.58334606570678	0.05	0.326746996598838	1.6	90	0.501756322632089
ldl	Control	IR	12	13	7.48645707466175	0.05	0.274811053492776	1.6	90	0.503049608981211
adma	Control	INR	12	9	7.48645707466175	0.05	0.315349488929182	1.6	90	0.519805086609358
SCD14	Control	VU	12	10	7.48645707466175	0.05	0.283799919756385	1.6	90	0.520309945449926
SCD14	IR	VU	13	10	7.09801008399674	0.05	0.270277219777	1.6	90	0.523803703703563
SCD14	INR	IR	9	13	9.58334606570678	0.05	0.269064039671819	1.6	90	0.539833166805065
hdl	INR	VU	9	10	9.58334606570678	0.05	0.258706250270594	1.6	90	0.581128973562113
il6	INR	VU	9	10	9.58334606570678	0.05	0.257816050166337	1.6	90	0.583747578546543
cd8	INR	IR	9	13	9.58334606570678	0.05	0.254461902002482	1.6	90	0.584147772373368
pcr	INR	VU	9	10	9.58334606570678	0.05	0.233179156994287	1.6	90	0.621450656920027
logtrecs	IR	VU	13	10	7.09801008399674	0.05	0.199772532389536	1.6	90	0.630447635232576
glu	INR	IR	9	13	9.58334606570678	0.05	0.218423207419493	1.6	90	0.631118678427852
creat	IR	VU	13	10	7.09801008399674	0.05	0.205987360562126	1.6	90	0.633187159486064
trigl	INR	IR	9	13	9.58334606570678	0.05	0.20814497198973	1.6	90	0.648410443211142
trigl	Control	INR	12	9	7.48645707466175	0.05	0.198956461949393	1.6	90	0.659834582086756
il6	IR	VU	13	10	7.09801008399674	0.05	0.188211203193739	1.6	90	0.676540401959044
pcr	Control	IR	12	13	7.48645707466175	0.05	0.164107741685514	1.6	90	0.686386017720023
il6	Control	INR	12	9	7.48645707466175	0.05	0.173095794583374	1.6	90	0.687409973942177
glu	Control	INR	12	9	7.48645707466175	0.05	0.179638982979455	1.6	90	0.695339622098761
pcr	Control	INR	12	9	7.48645707466175	0.05	0.171322812906517	1.6	90	0.695562968924515
trigl	INR	VU	9	10	9.58334606570678	0.05	0.168911144280378	1.6	90	0.71892282105258
CD8_57	Control	INR	12	9	7.48645707466175	0.05	0.146501821289254	1.6	90	0.743156917151349
CD8_57	INR	IR	9	13	9.58334606570678	0.05	0.128431478049879	1.6	90	0.773235538704286
CD8_DR38	INR	IR	9	13	9.58334606570678	0.05	0.115203080760893	1.6	90	0.77978435062048
creat	INR	VU	9	10	9.58334606570678	0.05	0.123369031989817	1.6	90	0.790708929813038
dim	INR	VU	9	10	9.58334606570678	0.05	0.120351684680855	1.6	90	0.803448929266016
cd8	Control	INR	12	9	7.48645707466175	0.05	0.1115100642991	1.6	90	0.806319803626091
cd4cd8ratio	INR	VU	9	10	9.58334606570678	0.05	0.10782686359606	1.6	90	0.820284230773394
creat	INR	IR	9	13	9.58334606570678	0.05	0.0910518853428566	1.6	90	0.835768142157018
hdl	INR	IR	9	13	9.58334606570678	0.05	0.0690390587358325	1.6	90	0.878004697173551
bpi	Control	VU	12	10	7.48645707466175	0.05	0.0522005543590952	1.6	90	0.903727228557356
glu	Control	IR	12	13	7.48645707466175	0.05	0.0445252148203003	1.6	90	0.912439293527485
ldl	INR	VU	9	10	9.58334606570678	0.05	0.0427161653486432	1.6	90	0.927696165375376
bpi	INR	VU	9	10	9.58334606570678	0.05	0.042531868292492	1.6	90	0.927991256514015
trigl	Control	VU	12	10	7.48645707466175	0.05	0.0357401496141369	1.6	90	0.934192898709678
adma	INR	IR	9	13	9.58334606570678	0.05	0.0361092411707242	1.6	90	0.940204553971399
CD8_57	Control	IR	12	13	7.48645707466175	0.05	0.0280753461443234	1.6	90	0.944882609044747
adma	INR	VU	9	10	9.58334606570678	0.05	0.0312173796134867	1.6	90	0.948194470818727
trigl	IR	VU	13	10	7.09801008399674	0.05	0.0279056684500864	1.6	90	0.94853433382143
logfxtimica	INR	IR	9	13	9.58334606570678	0.05	0.0266494974470808	1.6	90	0.951362286487345
cd4	IR	VU	13	10	7.09801008399674	0.05	0.023003183385116	1.6	90	0.957229980603008
col	INR	VU	9	10	9.58334606570678	0.05	0.0201886185825221	1.6	90	0.965518272755864
trigl	Control	IR	12	13	7.48645707466175	0.05	0.011814259104489	1.6	90	0.976848895914487
adma	IR	VU	13	10	7.09801008399674	0.05	0.00862352190697567	1.6	90	0.984352658908805
bpi	Control	INR	12	9	7.48645707466175	0.05	0.00445181666152844	1.6	90	0.992166767992009
