# Supplementary material for: Modulation of Saliva Microbiota through Prebiotic Intervention in HIV-Infected Individuals
Source: Nutrients. 2019 Jun 14;11(6):1346. doi: 10.3390/nu11061346 (PMC6627446; doi:10.3390/nu11061346)
Supplement: Supplementary file 1 [file nutrients-11-01346-s001.zip › Table S4.xls]

## Sheet: power.t.test.n1F2
Table S4. Sample size determination (n1) for groups after prebiotic intervention
feature	g1	g2	n2	real.n1	estimated.n1	sig.level	Cohen.effect.size	fixed.effect.size	pct.power	t.test.p.value
CD4_25	Control	INR	6	7	11.8779727074907	0.05	3.25603888693463	1.6	85	0.000380142350023419
CD4_DR38	Control	INR	6	7	11.8779727074907	0.05	3.23456739151493	1.6	85	0.000471562328584291
CD8_DR38	Control	VU	9	7	7.34616695199703	0.05	2.49318116356675	1.6	85	0.000504455490333912
cd8	Control	VU	9	7	7.34616695199703	0.05	2.14114282955187	1.6	85	0.000820142984558616
CD4_25	Control	VU	9	7	7.34616695199703	0.05	2.16545598928597	1.6	85	0.000828059643719767
cd4	Control	INR	6	7	11.8779727074907	0.05	2.59657420482404	1.6	85	0.000888375357509225
CD4_25	Control	IR	10	7	6.74530643927146	0.05	1.70896894692902	1.6	85	0.00257951397541996
cd4cd8ratio	IR	VU	9	10	7.34616695199703	0.05	1.5864966198306	1.6	85	0.00298850665875562
CD4_DR38	INR	IR	10	6	6.74530643927146	0.05	2.26977595246918	1.6	85	0.00363403965016759
CD4_DR38	Control	VU	9	7	7.34616695199703	0.05	1.8237094621646	1.6	85	0.00381678895557631
CD8_DR38	Control	IR	10	7	6.74530643927146	0.05	1.61442535396005	1.6	85	0.00415125038388687
cd4	INR	IR	10	6	6.74530643927146	0.05	1.63159821133852	1.6	85	0.00470345137254236
cd8	IR	VU	9	10	7.34616695199703	0.05	1.52882959004632	1.6	85	0.00506034538453753
SCD14	Control	INR	6	7	11.8779727074907	0.05	1.83092160449159	1.6	85	0.00963942447064884
cd4cd8ratio	Control	VU	9	7	7.34616695199703	0.05	1.80596978856094	1.6	85	0.0122646975208689
trigl	Control	IR	10	7	6.74530643927146	0.05	1.29015952263307	1.6	85	0.015343229030207
trigl	Control	VU	9	7	7.34616695199703	0.05	1.35702809765305	1.6	85	0.0156512332061769
CD4_DR38	IR	VU	9	10	7.34616695199703	0.05	1.38783570213369	1.6	85	0.0161966947303406
CD8_DR38	IR	VU	9	10	7.34616695199703	0.05	1.22180915117178	1.6	85	0.020306538567003
CD4_DR38	Control	IR	10	7	6.74530643927146	0.05	1.24569515474	1.6	85	0.0239955123216286
SCD14	INR	IR	10	6	6.74530643927146	0.05	1.23933093216824	1.6	85	0.0290932312245207
creat	Control	INR	6	7	11.8779727074907	0.05	1.40135668399254	1.6	85	0.0294113276812335
CD4_57	Control	VU	9	7	7.34616695199703	0.05	1.23155900729618	1.6	85	0.0299086495561028
creat	INR	VU	9	6	7.34616695199703	0.05	1.39354108798921	1.6	85	0.0324959570016574
cd8	INR	VU	9	6	7.34616695199703	0.05	1.19170056929857	1.6	85	0.0565960091328032
pcr	Control	INR	6	7	11.8779727074907	0.05	1.26883647590918	1.6	85	0.0699025449288727
pcr	INR	VU	9	6	7.34616695199703	0.05	1.26198861674765	1.6	85	0.0758879632369224
cd4cd8ratio	Control	IR	10	7	6.74530643927146	0.05	1.0902493254802	1.6	85	0.0760256117948975
CD4_57	IR	VU	9	10	7.34616695199703	0.05	0.922655288833083	1.6	85	0.0788433701119617
cd4	Control	IR	10	7	6.74530643927146	0.05	0.944607841557524	1.6	85	0.0823115027543698
trigl	Control	INR	6	7	11.8779727074907	0.05	1.1654021229764	1.6	85	0.0851843956053484
CD4_57	INR	VU	9	6	7.34616695199703	0.05	0.901984695147678	1.6	85	0.0901928060203182
dim	IR	VU	9	10	7.34616695199703	0.05	0.819151328514291	1.6	85	0.108968336689133
SCD14	INR	VU	9	6	7.34616695199703	0.05	0.895897911217261	1.6	85	0.110618600229735
hdl	Control	INR	6	7	11.8779727074907	0.05	0.955692081581174	1.6	85	0.112048997906986
CD4_25	INR	IR	10	6	6.74530643927146	0.05	0.814051406995331	1.6	85	0.126370119846623
CD4_57	Control	IR	10	7	6.74530643927146	0.05	0.752104960096251	1.6	85	0.128313248813515
hdl	Control	VU	9	7	7.34616695199703	0.05	0.771206802534523	1.6	85	0.154313581707339
creat	INR	IR	10	6	6.74530643927146	0.05	0.792545621184955	1.6	85	0.158327112067294
bpi	INR	VU	9	6	7.34616695199703	0.05	0.74734695661511	1.6	85	0.161302481952756
glu	INR	VU	9	6	7.34616695199703	0.05	0.829394156073727	1.6	85	0.173600754285502
CD4_57	Control	INR	6	7	11.8779727074907	0.05	0.859915824683598	1.6	85	0.173975041451266
col	INR	IR	10	6	6.74530643927146	0.05	0.760119828447495	1.6	85	0.176254401800478
CD8_25	INR	IR	10	6	6.74530643927146	0.05	0.814404166120001	1.6	85	0.185125454547557
SCD14	Control	VU	9	7	7.34616695199703	0.05	0.673352625167516	1.6	85	0.192386952269576
pcr	INR	IR	10	6	6.74530643927146	0.05	0.75533920715592	1.6	85	0.196485955822339
col	IR	VU	9	10	7.34616695199703	0.05	0.597004111187942	1.6	85	0.208295644872767
ldl	INR	IR	10	6	6.74530643927146	0.05	0.706732103897047	1.6	85	0.21153554198159
CD8_25	Control	INR	6	7	11.8779727074907	0.05	0.725345522377463	1.6	85	0.215933625056539
creat	Control	IR	10	7	6.74530643927146	0.05	0.640670280396469	1.6	85	0.217810481638492
CD8_57	INR	VU	9	6	7.34616695199703	0.05	0.670766597950529	1.6	85	0.223664806122275
cd8	Control	IR	10	7	6.74530643927146	0.05	0.562225593872529	1.6	85	0.255655743884898
dim	Control	IR	10	7	6.74530643927146	0.05	0.644586807498212	1.6	85	0.258478892966964
dim	INR	IR	10	6	6.74530643927146	0.05	0.716558005993646	1.6	85	0.263090027969827
creat	IR	VU	9	10	7.34616695199703	0.05	0.527370932883118	1.6	85	0.264047884757537
bpi	INR	IR	10	6	6.74530643927146	0.05	0.525436628980327	1.6	85	0.272687419655542
glu	INR	IR	10	6	6.74530643927146	0.05	0.636167071790252	1.6	85	0.283113067954899
glu	Control	INR	6	7	11.8779727074907	0.05	0.642392416838851	1.6	85	0.283612723909681
pcr	Control	IR	10	7	6.74530643927146	0.05	0.513893987090195	1.6	85	0.286593976292288
ldl	IR	VU	9	10	7.34616695199703	0.05	0.493299507642177	1.6	85	0.297456479220599
logtrecs	Control	INR	6	7	11.8779727074907	0.05	0.594949738684464	1.6	85	0.301561506693012
pcr	IR	VU	9	10	7.34616695199703	0.05	0.483427928917807	1.6	85	0.305477127803547
hdl	Control	IR	10	7	6.74530643927146	0.05	0.548528734551526	1.6	85	0.306880979400734
CD4_25	IR	VU	9	10	7.34616695199703	0.05	0.484718533230933	1.6	85	0.308167518122773
logtrecs	Control	IR	10	7	6.74530643927146	0.05	0.541999529829576	1.6	85	0.316333860174002
CD8_25	Control	VU	9	7	7.34616695199703	0.05	0.500554447541644	1.6	85	0.31929321038317
adma	Control	INR	6	7	11.8779727074907	0.05	0.618070928700251	1.6	85	0.322553237586316
CD8_25	IR	VU	9	10	7.34616695199703	0.05	0.494115566388657	1.6	85	0.325167412288679
hdl	INR	IR	10	6	6.74530643927146	0.05	0.54847855863449	1.6	85	0.330308908094722
adma	Control	IR	10	7	6.74530643927146	0.05	0.447074309517489	1.6	85	0.34357915630166
adma	IR	VU	9	10	7.34616695199703	0.05	0.446947711229293	1.6	85	0.343708919930399
cd4	INR	VU	9	6	7.34616695199703	0.05	0.473377146935252	1.6	85	0.344692623233073
il6	IR	VU	9	10	7.34616695199703	0.05	0.473360112981938	1.6	85	0.34470898393968
adma	INR	IR	10	6	6.74530643927146	0.05	0.44579982140838	1.6	85	0.344887647679864
il6	Control	VU	9	7	7.34616695199703	0.05	0.4730646640567	1.6	85	0.344993190240527
cd4	IR	VU	9	10	7.34616695199703	0.05	0.471306515470209	1.6	85	0.346688069898283
cd4	Control	VU	9	7	7.34616695199703	0.05	0.469760359726812	1.6	85	0.348183961219578
CD8_25	INR	VU	9	6	7.34616695199703	0.05	0.464806553091662	1.6	85	0.353039733801495
CD8_DR38	Control	INR	6	7	11.8779727074907	0.05	0.580253644842049	1.6	85	0.361013538277489
il6	INR	IR	10	6	6.74530643927146	0.05	0.57978058237206	1.6	85	0.361371903882692
il6	Control	INR	6	7	11.8779727074907	0.05	0.579646948677631	1.6	85	0.361473158682303
CD8_DR38	INR	IR	10	6	6.74530643927146	0.05	0.577648487176446	1.6	85	0.36299026333256
adma	INR	VU	9	6	7.34616695199703	0.05	0.564032255621258	1.6	85	0.363405388310292
CD8_DR38	INR	VU	9	6	7.34616695199703	0.05	0.574231385743446	1.6	85	0.365596608929024
cd4cd8ratio	INR	VU	9	6	7.34616695199703	0.05	0.542533882135072	1.6	85	0.389846874364714
CD8_57	IR	VU	9	10	7.34616695199703	0.05	0.39854897717546	1.6	85	0.400220193791537
bpi	Control	IR	10	7	6.74530643927146	0.05	0.397568588969804	1.6	85	0.40077814312701
logtrecs	INR	VU	9	6	7.34616695199703	0.05	0.419953906190588	1.6	85	0.420507297583014
col	Control	IR	10	7	6.74530643927146	0.05	0.423647489266582	1.6	85	0.430551269623267
logtrecs	IR	VU	9	10	7.34616695199703	0.05	0.365068734866477	1.6	85	0.443053977706233
SCD14	IR	VU	9	10	7.34616695199703	0.05	0.358013106680991	1.6	85	0.445762057150049
bpi	Control	VU	9	7	7.34616695199703	0.05	0.379472505023071	1.6	85	0.461979546839794
hdl	IR	VU	9	10	7.34616695199703	0.05	0.330985349418103	1.6	85	0.485423974466809
CD8_57	Control	VU	9	7	7.34616695199703	0.05	0.347816933204332	1.6	85	0.50545836871028
ldl	Control	INR	6	7	11.8779727074907	0.05	0.373971605240815	1.6	85	0.510850957129116
CD4_DR38	INR	VU	9	6	7.34616695199703	0.05	0.306798681031384	1.6	85	0.542045249816749
glu	IR	VU	9	10	7.34616695199703	0.05	0.278859240886778	1.6	85	0.552505837101347
bpi	Control	INR	6	7	11.8779727074907	0.05	0.329172164824144	1.6	85	0.561004722917215
cd4cd8ratio	INR	IR	10	6	6.74530643927146	0.05	0.348712985208326	1.6	85	0.571208345683862
il6	INR	VU	9	6	7.34616695199703	0.05	0.33307974818515	1.6	85	0.572959357311744
CD8_57	INR	IR	10	6	6.74530643927146	0.05	0.300323284986524	1.6	85	0.575299889144192
col	INR	VU	9	6	7.34616695199703	0.05	0.296362408864611	1.6	85	0.602934426702056
bpi	IR	VU	9	10	7.34616695199703	0.05	0.232370601767997	1.6	85	0.615421967090964
ldl	INR	VU	9	6	7.34616695199703	0.05	0.270898498944122	1.6	85	0.626350321369682
dim	Control	INR	6	7	11.8779727074907	0.05	0.28349439750959	1.6	85	0.630604549171617
CD8_57	Control	INR	6	7	11.8779727074907	0.05	0.270648955968617	1.6	85	0.633642839552509
il6	Control	IR	10	7	6.74530643927146	0.05	0.257644672496752	1.6	85	0.641435517447256
SCD14	Control	IR	10	7	6.74530643927146	0.05	0.221731507813244	1.6	85	0.645580504333166
cd8	Control	INR	6	7	11.8779727074907	0.05	0.268533445809947	1.6	85	0.65538408070639
dim	INR	VU	9	6	7.34616695199703	0.05	0.249324483241374	1.6	85	0.668517792327143
CD4_25	INR	VU	9	6	7.34616695199703	0.05	0.220366238977755	1.6	85	0.671173361825269
creat	Control	VU	9	7	7.34616695199703	0.05	0.203470749319609	1.6	85	0.699716064481226
trigl	IR	VU	9	10	7.34616695199703	0.05	0.177694131744862	1.6	85	0.701878760466912
logtrecs	Control	VU	9	7	7.34616695199703	0.05	0.194825461386642	1.6	85	0.708793894598999
glu	Control	VU	9	7	7.34616695199703	0.05	0.189080683071703	1.6	85	0.71713403457796
ldl	Control	IR	10	7	6.74530643927146	0.05	0.186412534570741	1.6	85	0.723615766137346
hdl	INR	VU	9	6	7.34616695199703	0.05	0.188135518829928	1.6	85	0.727198059138279
ldl	Control	VU	9	7	7.34616695199703	0.05	0.178087151578756	1.6	85	0.738985269771451
CD8_25	Control	IR	10	7	6.74530643927146	0.05	0.162083570018515	1.6	85	0.764200689202923
adma	Control	VU	9	7	7.34616695199703	0.05	0.146456259568009	1.6	85	0.778314380039741
col	Control	INR	6	7	11.8779727074907	0.05	0.1466362936026	1.6	85	0.794104814896003
pcr	Control	VU	9	7	7.34616695199703	0.05	0.109470768930171	1.6	85	0.836299384340307
trigl	INR	IR	10	6	6.74530643927146	0.05	0.0938334355897303	1.6	85	0.859244499846759
trigl	INR	VU	9	6	7.34616695199703	0.05	0.0719805390929883	1.6	85	0.897144281597659
cd8	INR	IR	10	6	6.74530643927146	0.05	0.0696941871447214	1.6	85	0.902955568481584
dim	Control	VU	9	7	7.34616695199703	0.05	0.063106596715276	1.6	85	0.903280685487381
glu	Control	IR	10	7	6.74530643927146	0.05	0.0604289701149542	1.6	85	0.906312574497654
CD4_57	INR	IR	10	6	6.74530643927146	0.05	0.0579957960043058	1.6	85	0.912005447370148
col	Control	VU	9	7	7.34616695199703	0.05	0.0509673609452163	1.6	85	0.925162586897679
logtrecs	INR	IR	10	6	6.74530643927146	0.05	0.0473505503976886	1.6	85	0.92726806466042
cd4cd8ratio	Control	INR	6	7	11.8779727074907	0.05	0.0334335305408227	1.6	85	0.955599453517361
CD8_57	Control	IR	10	7	6.74530643927146	0.05	0.0068921281466544	1.6	85	0.98931291611669
