# Supplementary figures and images for: Modulation of Saliva Microbiota through Prebiotic Intervention in HIV-Infected Individuals
Source: MDPI journal article supplement (doi:10.3390/nu11061346), 2019-06-14

**Figure S1.** Study profile

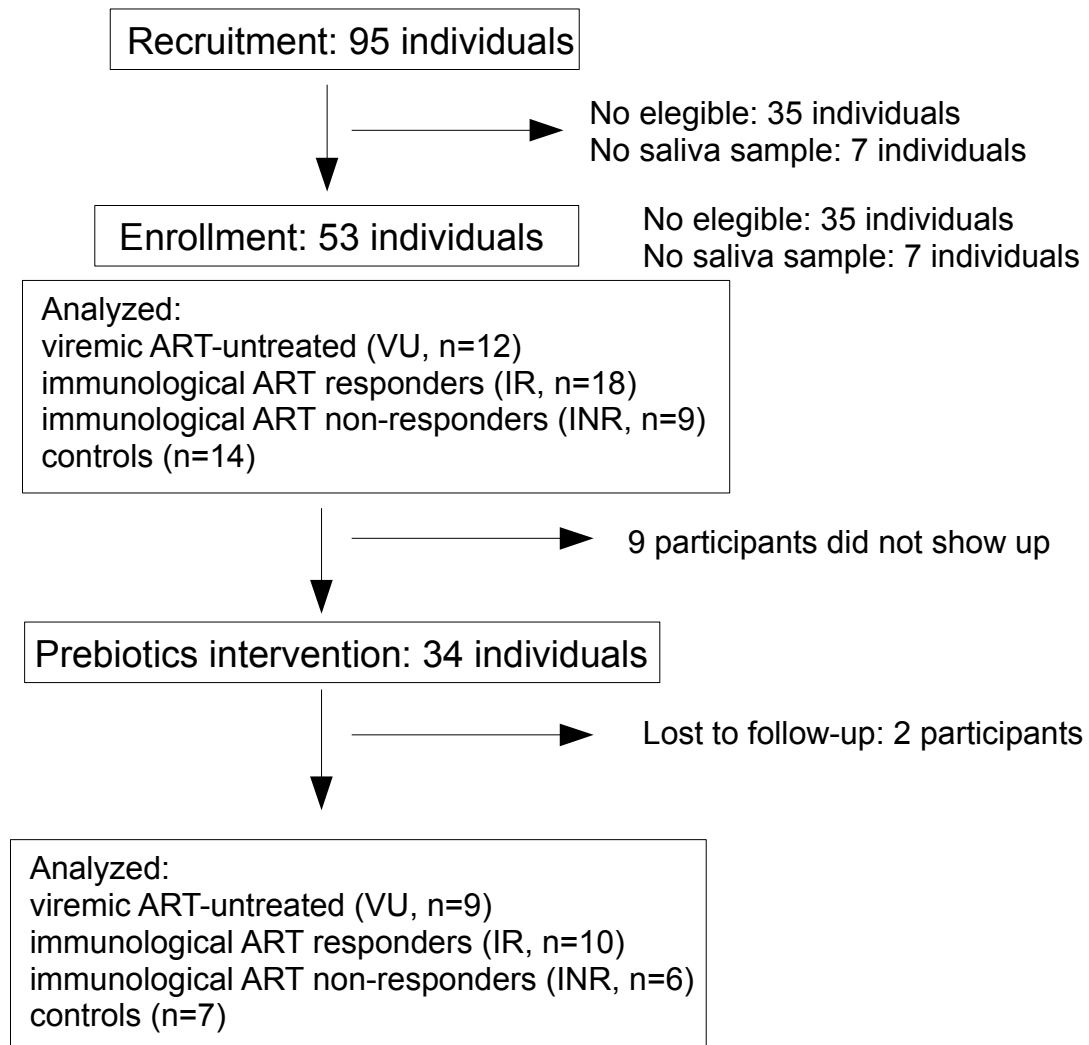

Supplement: s1 [file s1]
